# Supplementary material for: Comparison of Chicken Cecal Microbiota after Metaphylactic Treatment or Following Administration of Feed Additives in a Broiler Farm with Enterococcal Spondylitis History
Source: MDPI journal article supplement (doi:10.3390/pathogens10081068), 2021-08-23
Supplement: s1 [file s1]

**Table S1.** *p*-values <sup>1</sup> of pairwise comparisons of species richness estimators in cecal samples of chickens.

| <b>Day 11</b>                 |                         |                            |                     |
|-------------------------------|-------------------------|----------------------------|---------------------|
| <b>Observed Species index</b> | <i>B. licheniformis</i> | <b>Esterified butyrins</b> | <b>Lincospectin</b> |
| Esterified butyrins           | 1                       |                            |                     |
| Lincospectin                  | <b>0.0116</b>           | <b>0.0002</b>              |                     |
| Palm oil                      | 1                       | 1                          | <b>0.0029</b>       |
| <b>Chao 1 index</b>           | <i>B. licheniformis</i> | <b>Esterified butyrins</b> | <b>Lincospectin</b> |
| Esterified butyrins           | 0.9654                  |                            |                     |
| Lincospectin                  | <b>0.0082</b>           | <b>0.0075</b>              |                     |
| Palm oil                      | 0.4294                  | 0.4294                     | <b>0.0005</b>       |
| <b>Shannon index</b>          | <i>B. licheniformis</i> | <b>Esterified butyrins</b> | <b>Lincospectin</b> |
| Esterified butyrins           | 0.9650                  |                            |                     |
| Lincospectin                  | 0.0780                  | <b>0.0310</b>              |                     |
| Palm oil                      | 0.3030                  | 0.2520                     | 0.3810              |
| <b>Day 20</b>                 |                         |                            |                     |
| <b>Observed Species index</b> | <i>B. licheniformis</i> | <b>Esterified butyrins</b> | <b>Lincospectin</b> |
| Esterified butyrins           | 0.7680                  |                            |                     |
| Lincospectin                  | <b>0.0019</b>           | <b>0.0003</b>              |                     |
| Palm oil                      | 0.3910                  | 0.7680                     | <b>0.0039</b>       |
| <b>Chao1 index</b>            | <i>B. licheniformis</i> | <b>Esterified butyrins</b> | <b>Lincospectin</b> |
| Esterified butyrins           | 1                       |                            |                     |
| Lincospectin                  | <b>0.0016</b>           | <b>0.0022</b>              |                     |
| Palm oil                      | 1                       | 1                          | <b>0.0026</b>       |
| <b>Shannon index</b>          | <i>B. licheniformis</i> | <b>Esterified butyrins</b> | <b>Lincospectin</b> |
| Esterified butyrins           | 0.0540                  |                            |                     |
| Lincospectin                  | 1                       | 1                          |                     |
| Palm oil                      | 0.1160                  | 1                          | 1                   |
| <b>Day 33</b>                 |                         |                            |                     |
| <b>Observed Species index</b> | <i>B. licheniformis</i> | <b>Esterified butyrins</b> | <b>Lincospectin</b> |
| Esterified butyrins           | 0.4085                  |                            |                     |
| Lincospectin                  | <b>0.0395</b>           | <b>0.0026</b>              |                     |
| Palm oil                      | 0.5354                  | 0.0710                     | <b>0.0710</b>       |
| <b>Chao1 index</b>            | <i>B. licheniformis</i> | <b>Esterified butyrins</b> | <b>Lincospectin</b> |
| Esterified butyrins           | 0.5470                  |                            |                     |
| Lincospectin                  | 0.1739                  | <b>0.00045</b>             |                     |
| Palm oil                      | 1                       | 1                          | 0.0507              |
| <b>Shannon index</b>          | <i>B. licheniformis</i> | <b>Esterified butyrins</b> | <b>Lincospectin</b> |
| Esterified butyrins           | 1                       |                            |                     |
| Lincospectin                  | 1                       | 1                          |                     |
| Palm oil                      | 1                       | 1                          | 1                   |

<sup>1</sup>*p*-values < 0.05 are written in bold

**Table S2.** Families with significant different abundance between lincospectin and the administered feed additives at day 11.

| <b>Lincospectin vs <i>B. licheniformis</i></b> |               |             |               |                |                     |                    |                               |
|------------------------------------------------|---------------|-------------|---------------|----------------|---------------------|--------------------|-------------------------------|
| <b>log2FoldChange</b>                          | <b>pvalue</b> | <b>padj</b> | <b>OTU_ID</b> | <b>Phylum</b>  | <b>Class</b>        | <b>Order</b>       | <b>Family</b>                 |
| -6.87                                          | 7.15e-15      | 2.29e-13    | OTU_2         | Bacteroidetes  | Bacteroidia         | Bacteroidales      | Bacteroidaceae                |
| 8.11                                           | 7.94e-10      | 1.27e-08    | OTU_76        | Actinobacteria | Actinobacteria      | Bifidobacteriales  | Bifidobacteriaceae            |
| 6.85                                           | 2.29e-09      | 2.44e-08    | OTU_208       | Firmicutes     | Bacilli             | Bacillales         | Staphylococcaceae             |
| -5.34                                          | 1.76e-08      | 1.41e-07    | OTU_137       | Firmicutes     | Clostridia          | Clostridiales      | Clostridiaceae 1              |
| -10.1                                          | 3.82e-08      | 2.44e-07    | OTU_57        | Tenericutes    | Mollicutes          | Mollicutes RF9     | uncultured rumen bacterium    |
| -7.38                                          | 3.32e-07      | 1.77e-06    | OTU_277       | Firmicutes     | Clostridia          | Clostridiales      | Defluviitaleaceae             |
| -5.50                                          | 1.16e-05      | 5.32e-05    | OTU_121       | Firmicutes     | Clostridia          | Clostridiales      | Ambiguous_taxa                |
| -5.96                                          | 8.96e-05      | 0.0004      | OTU_148       | Tenericutes    | Mollicutes          | Mollicutes RF9     | uncultured bacterium          |
| 2.43                                           | 0.0011        | 0.0040      | OTU_24        | Proteobacteria | Gammaproteobacteria | Enterobacteriales  | Enterobacteriaceae            |
| -4.90                                          | 0.0016        | 0.0052      | OTU_74        | Tenericutes    | Mollicutes          | Mollicutes RF9     | Ambiguous_taxa                |
| -0.951                                         | 0.0020        | 0.0059      | OUT_3         | Firmicutes     | Clostridia          | Clostridiales      | Ruminococcaceae               |
| -2.69                                          | 0.0032        | 0.0084      | OTU_102       | Firmicutes     | Clostridia          | Clostridiales      | Christensenellaceae           |
| -2.11                                          | 0.0040        | 0.0097      | OTU_115       | Firmicutes     | Clostridia          | Clostridiales      | Clostridiales vadinBB60 group |
| -2.02                                          | 0.0066        | 0.0220      | OTU_62        | Firmicutes     | Bacilli             | Lactobacillales    | Streptococcaceae              |
| 2.44                                           | 0.0147        | 0.0461      | OTU_11        | Firmicutes     | Erysipelotrichia    | Erysipelotrichales | Erysipelotrichaceae           |
| <b>Lincospectin vs Esterified butyrins</b>     |               |             |               |                |                     |                    |                               |
| <b>log2FoldChange</b>                          | <b>pvalue</b> | <b>padj</b> | <b>OTU_ID</b> | <b>Phylum</b>  | <b>Class</b>        | <b>Order</b>       | <b>Family</b>                 |
| -8.57                                          | 1.46e-18      | 6.27e-17    | OTU_2         | Bacteroidetes  | Bacteroidia         | Bacteroidales      | Bacteroidaceae                |
| -11.5                                          | 2.99e-15      | 6.43e-14    | OTU_57        | Tenericutes    | Mollicutes          | Mollicutes RF9     | uncultured rumen bacterium    |
| 8.69                                           | 1.44e-13      | 2.07e-12    | OTU_76        | Actinobacteria | Actinobacteria      | Bifidobacteriales  | Bifidobacteriaceae            |
| 6.52                                           | 7.58e-10      | 8.15e-09    | OTU_208       | Firmicutes     | Bacilli             | Bacillales         | Staphylococcaceae             |
| -4.51                                          | 1.15e-07      | 9.93e-07    | OTU_227       | Firmicutes     | Clostridia          | Clostridiales      | Clostridiaceae 1              |
| -6.15                                          | 2.79e-06      | 2.00e-05    | OTU_277       | Firmicutes     | Clostridia          | Clostridiales      | Defluviitaleaceae             |
| -5.52                                          | 5.95e-06      | 3.66e-05    | OTU_67        | Tenericutes    | Mollicutes          | Mollicutes RF9     | uncultured bacterium          |
| -5.22                                          | 7.10e-06      | 3.82e-05    | OTU_74        | Tenericutes    | Mollicutes          | Mollicutes RF9     | Ambiguous_taxa                |
| -5.59                                          | 2.04e-05      | 9.76e-05    | OTU_121       | Firmicutes     | Clostridia          | Clostridiales      | Ambiguous_taxa                |
| -2.53                                          | 0.0021        | 0.0090      | OTU_102       | Firmicutes     | Clostridia          | Clostridiales      | Christensenellaceae           |
| 0.986                                          | 0.0025        | 0.0099      | OTU_4         | Firmicutes     | Clostridia          | Clostridiales      | Lachnospiraceae               |
| <b>Lincospectin vs Palm oil</b>                |               |             |               |                |                     |                    |                               |
| <b>log2FoldChange</b>                          | <b>pvalue</b> | <b>padj</b> | <b>OTU_ID</b> | <b>Phylum</b>  | <b>Class</b>        | <b>Order</b>       | <b>Family</b>                 |

---

|        |           |           |         |                |                  |                    |                            |
|--------|-----------|-----------|---------|----------------|------------------|--------------------|----------------------------|
| -12.0  | 4.91e-100 | 1.47e-98  | OTU_2   | Bacteroidetes  | Bacteroidia      | Bacteroidales      | Bacteroidaceae             |
| -7.64  | 9.98e-19  | 1.50 e-17 | OTU_121 | Firmicutes     | Clostridia       | Clostridiales      | Ambiguous_taxa             |
| -7.37  | 1.25e-09  | 1.25e-08  | OTU_67  | Tenericutes    | Mollicutes       | Mollicutes RF9     | uncultured bacterium       |
| -9.23  | 1.03e-07  | 7.74e-07  | OTU_57  | Tenericutes    | Mollicutes       | Mollicutes RF9     | uncultured rumen bacterium |
| 5.95   | 2.24e-06  | 1.19e-05  | OTU_76  | Actinobacteria | Actinobacteria   | Bifidobacteriales  | Bifidobacteriaceae         |
| -4.94  | 2.39e-06  | 1.19e-05  | OTU_227 | Firmicutes     | Clostridia       | Clostridiales      | Clostridiaceae 1           |
| -5.73  | 2.17e-05  | 9.28e-05  | OTU_277 | Firmicutes     | Clostridia       | Clostridiales      | Defluviitaleaceae          |
| -4.75  | 3.65e-05  | 0.0001    | OTU_205 | Tenericutes    | Mollicutes       | Mollicutes RF9     | Ambiguous_taxa             |
| 3.63   | 0.0001    | 0.0005    | OTU_208 | Firmicutes     | Bacilli          | Bacillales         | Staphylococcaceae          |
| -3.03  | 0.0008    | 0.0025    | OTU_102 | Firmicutes     | Clostridia       | Clostridiales      | Christensenellaceae        |
| -2.40  | 0.0036    | 0.0098    | OTU_744 | Bacteroidetes  | Bacteroidia      | Bacteroidales      | Prevotellaceae             |
| -0.766 | 0.0053    | 0.0145    | OTU_1   | Firmicutes     | Clostridia       | Clostridiales      | Ruminococcaceae            |
| 1.48   | 0.0106    | 0.0268    | OTU_11  | Firmicutes     | Erysipelotrichia | Erysipelotrichales | Erysipelotrichaceae        |
| 0.726  | 0.0212    | 0.0499    | OTU_4   | Firmicutes     | Clostridia       | Clostridiales      | Lachnospiraceae            |

---
